# Supplementary material
Source: PubMed Central journal article supplement (PMC2764103)
Supplement: mmc1.pdf [file mmc1.pdf]

Biophysical Journal, Volume 97

**Supporting Material**

**Anastral Spindle Assembly: A Mathematical Model**

Mark A. Hallen and Sharyn A. Endow

# Anastral Spindle Assembly: A Mathematical Model

Mark A. Hallen and Sharyn A. Endow

## Supporting Material

**Table S1 Variables and constants**

---

**Diffusion and aster aggregation with the karyosome**

---

|          |                                                                                                                                               |
|----------|-----------------------------------------------------------------------------------------------------------------------------------------------|
| $r_k$    | Radius of karyosome                                                                                                                           |
| $r_{gv}$ | Radius of germinal vesicle                                                                                                                    |
| $\rho$   | Distance of a given point from the karyosome (i.e., radial coordinate in the spherical coordinate system)                                     |
| $S$      | Distance between the center of the germinal vesicle and the karyosome                                                                         |
| $\theta$ | Colatitude in the spherical coordinate system (i.e., angle defined by the given point, the karyosome, and the center of the germinal vesicle) |

---

**Capture of asters by the karyosome**

---

|            |                                                                                        |
|------------|----------------------------------------------------------------------------------------|
| $k_{on}^*$ | Pseudo-first order association rate constant for asters binding cytoskeletal filaments |
| $k_{off}$  | Dissociation rate constant for asters from cytoskeletal filaments                      |
| $C_{eq}$   | Fraction of bound asters at equilibrium                                                |
| $F_{eq}$   | Fraction of free asters at equilibrium, $F_{eq} + C_{eq} = 1$                          |
| $K_b$      | Strength of binding constant                                                           |
| $f$        | A function of space and time representing the number of asters per unit volume         |
| $D$        | Diffusion coefficient                                                                  |

|            |                                                                                      |
|------------|--------------------------------------------------------------------------------------|
| $v$        | Transport velocity                                                                   |
| $C_1$      | 1 <sup>st</sup> constant of integration from solving Eq. 5 at steady state           |
| $C_2$      | 2 <sup>nd</sup> constant of integration from solving Eq. 5 at steady state           |
| $Q$        | $v/DK_b$ (quantifies importance of transport relative to diffusion)                  |
| $R$        | Distance of a given point from the center of a capturing object (here the karyosome) |
| $J_{in}$   | Flux of asters toward the karyosome                                                  |
| $J_{out}$  | Flux of asters outward from the karyosome                                            |
| $J_\rho$   | Flux of asters along the radial dimension                                            |
| $Ei$       | Exponential integral function                                                        |
| $C_{init}$ | Fraction of asters initially bound                                                   |

---

#### Aster capture by the karyosome in live cells

---

|       |                         |
|-------|-------------------------|
| $M_r$ | Relative molecular mass |
|-------|-------------------------|

---

#### Spindle elongation and the onset of bipolarity

---

|          |                                                                                                |
|----------|------------------------------------------------------------------------------------------------|
| $x$      | Spindle axis coordinate, distance to chromosomes                                               |
| $\rho_1$ | Density of unaligned spindle microtubules                                                      |
| $\rho_2$ | Density of spindle axis-aligned microtubules                                                   |
| $\rho_3$ | Density of cross-linking spindle microtubules                                                  |
| $k_a$    | Rate constant of aligning microtubules                                                         |
| $k_d$    | Rate constant of losing microtubule alignment                                                  |
| $k_c$    | Rate constant of cross-linking microtubules attached to different chromosomes                  |
| $k_{dc}$ | Rate constant of breaking cross-links between microtubules attached to different chromosomes   |
| $k_e$    | Rate constant quantifying elongation for spindle axis-aligned microtubules (defined by Eq. 13) |

$k_r$  Rate constant quantifying elongation for other microtubules  
(defined by Eq. 16)

$L$  Spindle length

---

### Capture of asters by the karyosome

An expanded form of Eq. 11 is shown below:

$$P_{tot} = \frac{3}{4\pi(r_{gv}^3 - r_k^3)} \left( \int_0^{2\pi r_{gv} - S} \int_{r_k}^{\pi} \int_0^{\pi} P(\rho) \rho^2 \sin\theta d\theta d\rho d\phi \right. \\ \left. + \int_0^{2\pi r_{gv} + S} \int_{r_{gv} - S}^{\cos^{-1}\left(\frac{S^2 + \rho^2 - r_{gv}^2}{2S\rho}\right)} \int_0^{\pi} P(\rho) \rho^2 \sin\theta d\theta d\rho d\phi \right) = \\ \frac{3}{2(r_{gv}^3 - r_k^3)(1 - e^{-Q/r_k})} \left( \frac{1}{3} \left[ e^{-Q/r_m} (-2r_m^3 + Qr_m^2 - Q^2 r_m) + 2r_m^3 - Q^3 Ei(-Q/r_m) \right] \right. \\ \left. - \frac{1}{3} \left[ e^{-Q/r_k} (-2r_k^3 + Qr_k^2 - Q^2 r_k) + 2r_k^3 - Q^3 Ei(-Q/r_k) \right] \right. \\ \left. + \frac{1}{24} \left[ r_p e^{-Q/r_p} \left( Q^2 \left( \frac{r_p}{2S} - 4 \right) + 2Q \left( 3W - \frac{r_p^2}{2S} + 2r_p \right) \right) \right. \right. \\ \left. \left. + 2r_p (e^{Q/r_p} - 1) \left( 3W - \frac{3r_p^2}{2S} + 4r_p \right) - \frac{Q^3}{2S} \right] \right. \\ \left. - \frac{1}{24} \left[ r_m e^{-Q/r_m} \left( Q^2 \left( \frac{r_m}{2S} - 4 \right) + 2Q \left( 3W - \frac{r_m^2}{2S} + 2r_m \right) \right) \right. \right. \\ \left. \left. + 2r_m (e^{Q/r_m} - 1) \left( 3W - \frac{3r_m^2}{2S} + 4r_m \right) - \frac{Q^3}{2S} \right] \right) \right)$$

$$r_p = r_{gv} + S$$

$$r_m = r_{gv} - S$$

$$W = \frac{r_{gv}^2 - S^2}{S}$$

where  $Ei$  is an exponential integral function. Note that the total captured fraction does not depend on  $v$ ,  $K_b$ , or  $D$  explicitly, but only on  $Q$ .

Eq. 12 can be expanded as shown:

$$C_{init} = \frac{3}{4\pi(r_{gv}^3 - r_k^3)} \left( \int_0^{2\pi r_{gv} - S} \int_{r_k}^{\pi} \int_0^{\pi} \frac{1}{1 + K_b \rho^2} \rho^2 \sin \theta d\theta d\rho d\phi \right. \\ \left. + \int_0^{2\pi r_{gv} + S} \int_{r_{gv} - S}^{\cos^{-1}\left(\frac{S^2 + \rho^2 - r_{gv}^2}{2S\rho}\right)} \int_0^{\pi} \frac{1}{1 + K_b \rho^2} \rho^2 \sin \theta d\theta d\rho d\phi \right) = \\ \frac{3}{2(r_{gv}^3 - r_k^3)} \left( 2 \left( \frac{r_m}{K_b} - \frac{\tan^{-1}(r_m \sqrt{K_b})}{K_b^{3/2}} - \frac{r_k}{K_b} + \frac{\tan^{-1}(r_k \sqrt{K_b})}{K_b^{3/2}} \right) \right. \\ \left. + \frac{1}{4K_b^2 S} \left( K_b r_p (4S - r_p) - K_b r_m (4S - r_m) \right. \right. \\ \left. \left. + 4\sqrt{K_b} S (\tan^{-1}(\sqrt{K_b} r_m) - \tan^{-1}(\sqrt{K_b} r_p)) \right. \right. \\ \left. \left. + (K_b S W + 1) \ln \left( \frac{K_b r_p^2 + 1}{K_b r_m^2 + 1} \right) \right) \right)$$
